# Supplementary material for: The influences of El Niño–Southern Oscillation on tropospheric ozone in CMIP6 models
Source: Copernicus journal article supplement (doi:10.5194/egusphere-2023-207), 2023-06-26
Supplement: Supplementary file 1 [file egusphere-2023-207-supplement.pdf]

## 1 **Text S1**

2 We use the following multivariate predictive model (e.g., Stern and Kaufmann 2013, Mosedale  
3 *et al* 2006) to estimate the causal links between the ENSO and ozone concentration:

$$4 \mathbf{X}_t = \sum_{i=1}^p \alpha_i \mathbf{X}_{t-i} + \sum_{i=1}^p \beta_i \mathbf{Y}_{t-i} + \sum_{j=1}^m \sum_{i=1}^p \delta_{j,i} \mathbf{Z}_{j,t-i} + \boldsymbol{\varepsilon}_t \quad (1)$$

5 where  $X_t$  is the annual mean (or seasonal mean) ozone concentration for year  $t$ ,  $Y_t$  is the ENSO  
6 index, and  $Z_{j,t}$  is the confounding factor  $j$  for year  $t$ . In the predictive model shown in equation 1,  
7 while estimating the influence of  $Y$  on  $X$  (i.e., the contribution of the term  $\sum_{i=1}^p \beta_i Y_{t-i}$  in  
8 predicting  $X$ ), the contribution of past  $X$  events are already taken into account by adding the term  
9  $\sum_{i=1}^p \alpha_i X_{t-i}$ . Thus, the causal influence of  $Y$  on  $X$ , if detected, is robust and the contribution of  
10 past  $X$  events are already considered in our analyses. Here,  $m$  is number of confounding factors  
11 and  $p \geq 1$  is the order of the multivariate predictive model. The optimal order  $p$  is computed by  
12 minimizing the Schwarz criterion or the Bayesian information criterion (Schwarz 1978). The  
13 optimal orders might be different for each model.

14 The ENSO index was computed as the average sea surface temperature (SST) anomalies in the  
15 Niño 3.4 area (120–170°W; 5°N–5°S) in boreal winter (December–January–February, DJF).  
16 Confounding factors (i.e., the dipole mode index (DMI; Saji et al., 1999), the Southern Annular  
17 Mode (SAM) and the North Atlantic Oscillation (NAO; e.g., Hurrell et al., 2003)) may have  
18 effects on the connections between ENSO and ozone concentration. The DMI was given as the  
19 difference in boreal fall (September–October–November, SON) SST anomalies between two  
20 Indian Ocean regions of the western pole (50–70°E; 10°N–10°S) and southeastern pole (90–  
21 110°E; 0°N–10°S). The SAM (Cai et al., 2011) was calculated as the first empirical orthogonal  
22 function (EOF) of the boreal summer (June–July–August, JJA) sea level pressure (SLP)  
23 anomalies for the region of 40–70°S. The NAO index is computed as the EOF of boreal winter  
24 (DJF) SLP anomalies in the North Atlantic area (90°W–40°E, 20°–70°N).

25 We estimate the probability of no Granger causality by applying a test of Granger causality (Le  
26 and Bae, 2020; Mosedale et al., 2006; Stern and Kaufmann, 2013) for the multivariate predictive  
27 model shown in equation 1. For computing the degree of uncertainty, we followed recent  
28 guidance (Stocker et al., 2013) and utilized the terms ‘very unlikely’, ‘unlikely’, ‘likely’ for the  
29 0–10%, 0–33%, and 66–100% probability of the likelihood of the outcome, respectively. For

30 example, if the  $p$ -value is less than 0.33, the result indicates that ENSO is unlikely to display no  
31 Granger causality on ozone concentration. In this instance, we conclude that ENSO has ‘causal  
32 effect’ on ozone concentration.

### 33 **References**

- 34 Cai, W., Sullivan, A. and Cowan, T.: Interactions of ENSO, the IOD, and the SAM in CMIP3  
35 Models, *J. Clim.*, 24(6), 1688–1704, doi:10.1175/2010JCLI3744.1, 2011.
- 36 Hurrell, J. W., Kushnir, Y., Ottersen, G. and Visbeck, M.: An overview of the North Atlantic  
37 Oscillation, in *Geophysical Monograph American Geophysical Union*, pp. 1–35, American  
38 Geophysical Union., 2003.
- 39 Le, T. and Bae, D.-H.: Response of global evaporation to major climate modes in historical and  
40 future Coupled Model Intercomparison Project Phase 5 simulations, *Hydrol. Earth Syst. Sci.*,  
41 24(3), 1131–1143, doi:10.5194/hess-24-1131-2020, 2020.
- 42 Mosedale, T. J., Stephenson, D. B., Collins, M. and Mills, T. C.: Granger Causality of Coupled  
43 Climate Processes: Ocean Feedback on the North Atlantic Oscillation, *J. Clim.*, 19(7), 1182–  
44 1194, doi:10.1175/JCLI3653.1, 2006.
- 45 Saji, N. H., Goswami, B. N., Vinayachandran, P. N. and Yamagata, T.: A dipole mode in the  
46 tropical Indian Ocean, *Nature*, 401(6751), 360–363, doi:10.1038/43854, 1999.
- 47 Stern, D. I. and Kaufmann, R. K.: Anthropogenic and natural causes of climate change, *Clim.*  
48 *Change*, 122(1–2), 257–269, doi:10.1007/s10584-013-1007-x, 2013.
- 49 Stocker, T. F., Qin, D., Plattner, G.-K., Alexander, L. V., Allen, S. K., Bindoff, N. L., Bréon, F.-  
50 M., Church, J. A., Cubasch, U., Emori, S., Forster, P., Friedlingstein, P., Gillett, N., Gregory, J.  
51 M., Hartmann, D. L., Jansen, E., Kirtman, B., Knutti, R., Kumar, K. K., Lemke, P., Marotzke, J.,  
52 Masson-Delmotte, V. Meehl, G. A., Mokhov, I. I., Piao, S., Ramaswamy, V., Randall, D., Rhein,  
53 M., Rojas, M., Sabine, C., Shindell, D., Talley, L. D., Vaughan, D. G. and Xie, S.-P.: Technical  
54 Summary, in *Climate Change 2013 - The Physical Science Basis*, edited by Intergovernmental  
55 Panel on Climate Change, pp. 31–116, Cambridge University Press, Cambridge., 2013.

56

57 **Table S1.** List of CMIP6 models used in this study.

| No. | Model name      | Modelling center, country | Atmospheric Chemistry model |
|-----|-----------------|---------------------------|-----------------------------|
| 1   | BCC_CSM2_MR     | BCC, China                | None                        |
| 2   | BCC_ESM1        | BCC, China                | BCC-AGCM3-Chem              |
| 3   | CESM2           | NCAR, United States       | MAM4                        |
| 4   | CESM2_FV2       | NCAR, United States       | MAM4                        |
| 5   | CESM2_WACCM     | NCAR, United States       | MAM4                        |
| 6   | CESM2_WACCM_FV2 | NCAR, United States       | MAM4                        |
| 7   | CNRM_CM6_1      | CNRM-CERFACS, France      | OZL_v2                      |
| 8   | CNRM_CM6_1_HR   | CNRM-CERFACS, France      | OZL_v2                      |
| 9   | CNRM_ESM2_1     | CNRM-CERFACS, France      | REPROBUS-C_v2               |
| 10  | IPSL_CM6A_LR    | IPSL, France              | None                        |
| 11  | MPI_ESM1_2_HAM  | MPI-M, Germany            | Sulfur chemistry (unnamed)  |
| 12  | MPI_ESM1_2_LR   | MPI-M, Germany            | None                        |

58

MODELS STD OF ANNUAL OZ300 (ppbv) PERIOD 1850-2014 EXPERIMENT HISTORICAL

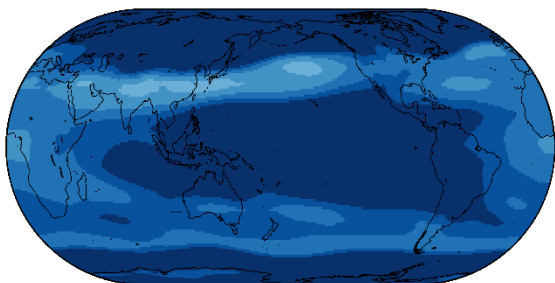

MODELS STD OF ANNUAL OZ500 (ppbv) PERIOD 1850-2014 EXPERIMENT HISTORICAL

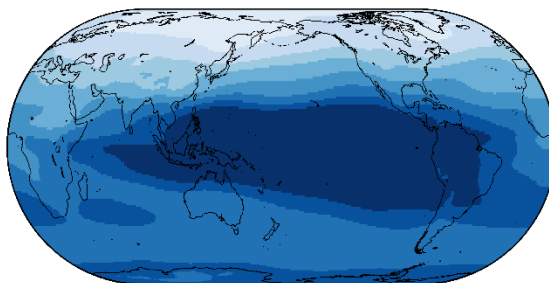

MODELS STD OF ANNUAL OZ850 (ppbv) PERIOD 1850-2014 EXPERIMENT HISTORICAL

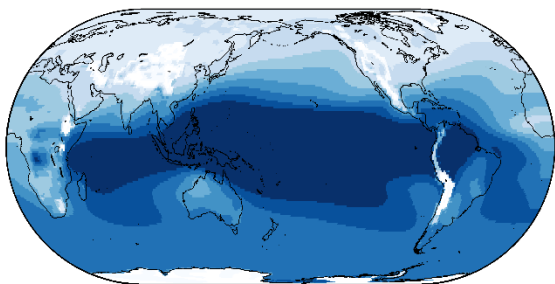

MODELS STD OF ANNUAL OZ1000 (ppbv) PERIOD 1850-2014 EXPERIMENT HISTORICAL

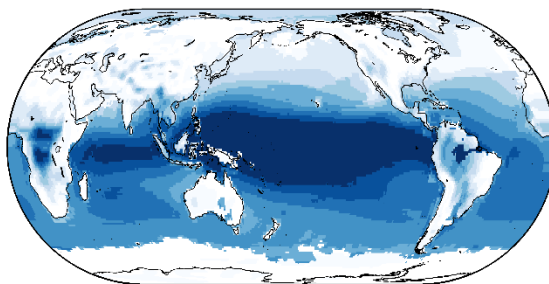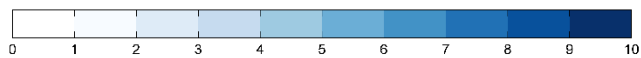

59

60 **Figure S1.** Multi-model mean map of standard deviation of annual ozone concentrations (ppbv) for the  
61 historical experiment over the 1850-2014 period at 300 hPa (a), 500 hPa (b), 850 hPa (c) and 1000 hPa  
62 (d) pressure levels, respectively.

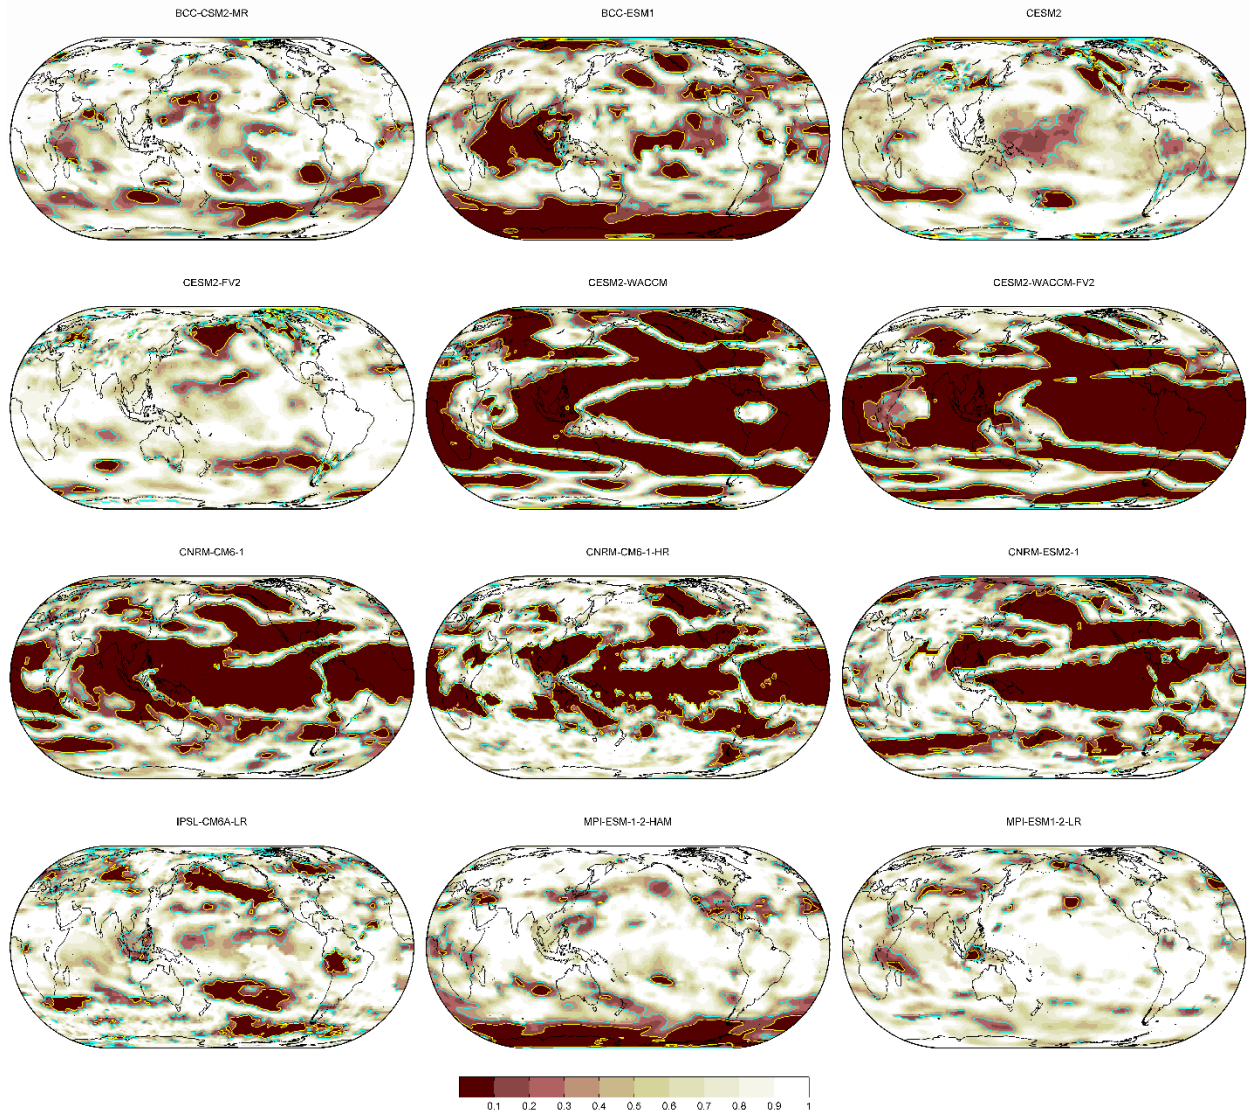

63

64 **Figure S2.** Probability for the absence of Granger causality from ENSO to annual ozone concentrations at  
 65 300 hPa pressure level for the historical experiment over the 1850-2014 period of 12 individual models  
 66 (see Table S1). The cyan and yellow contour lines signify  $p$ -value = 0.33 and 0.1, respectively. Brown  
 67 shades denote a low probability for the absence of Granger causality. ENSO: El Niño–Southern  
 68 Oscillation.



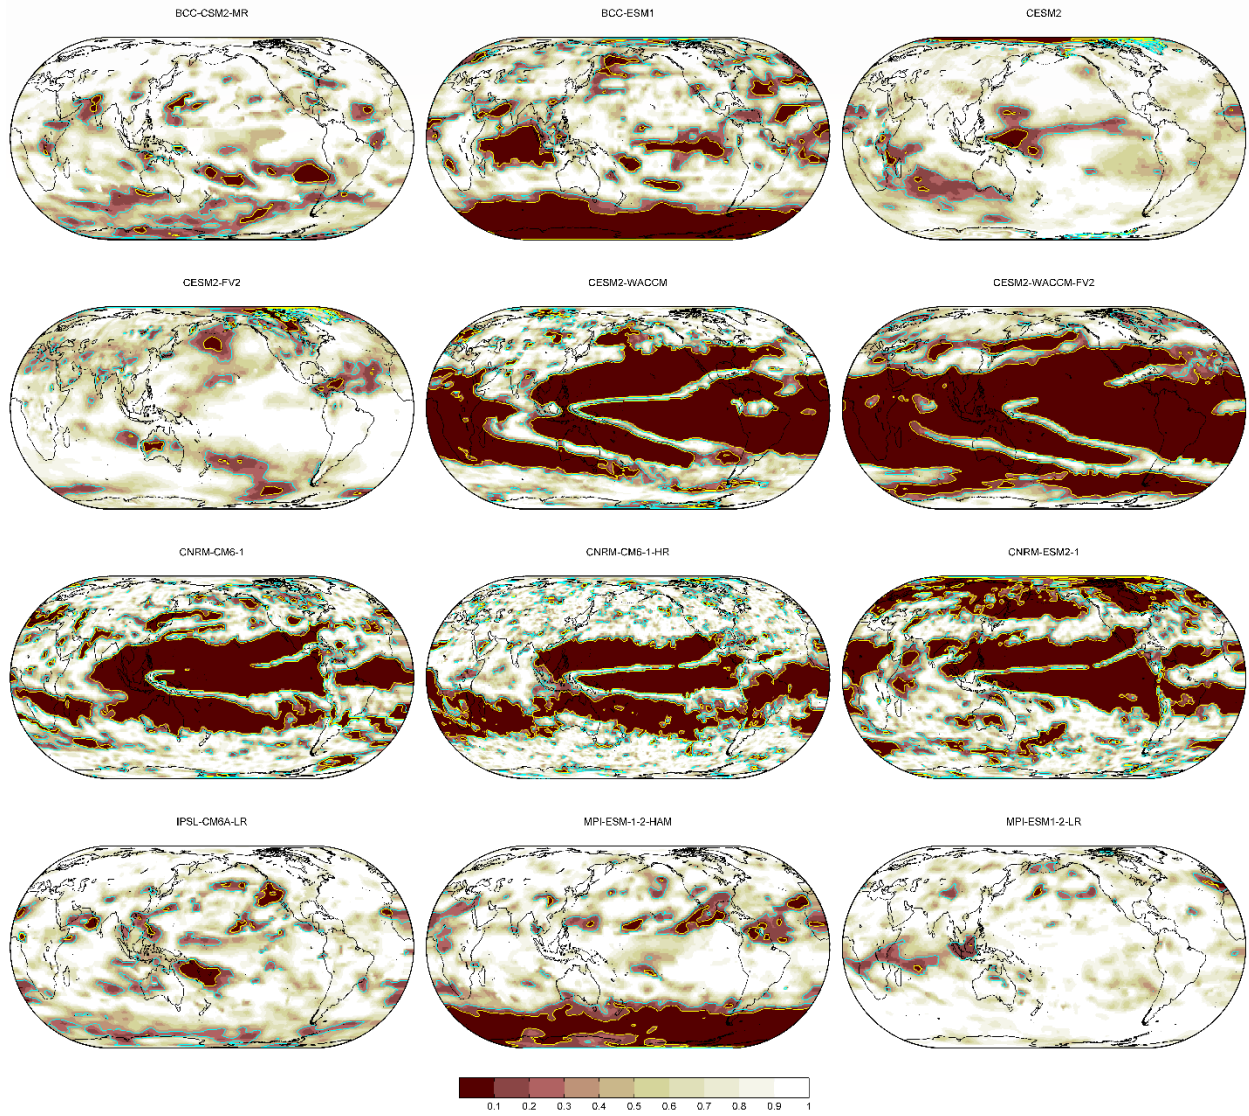

69

70 **Figure S3.** As in Figure S2, but for the absence of Granger causality from ENSO to annual ozone  
 71 concentrations at 500 hPa pressure level. ENSO: El Niño–Southern Oscillation.

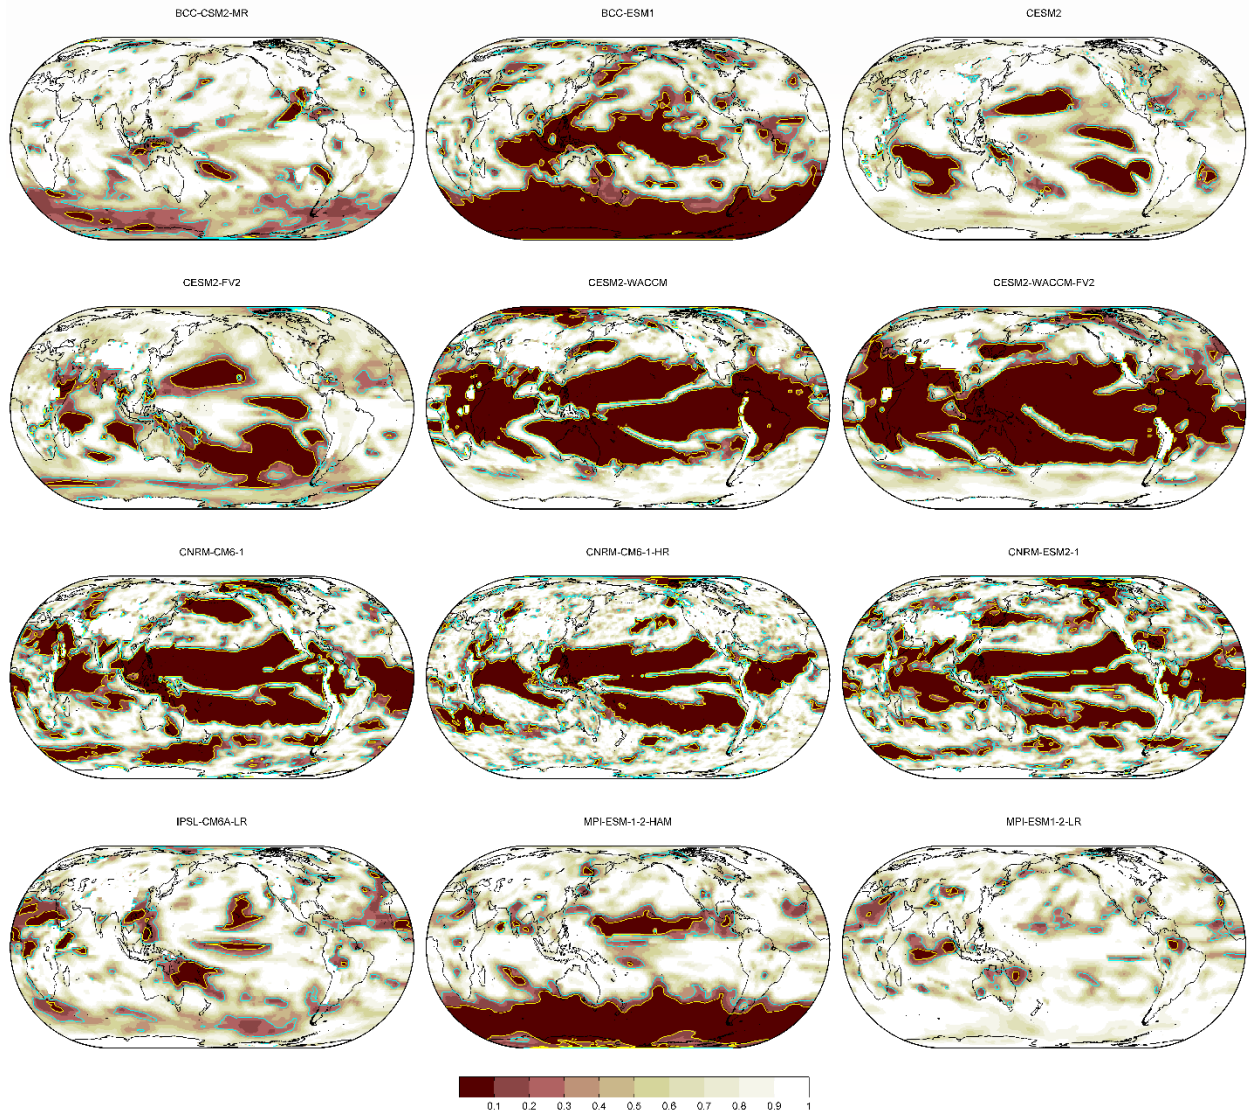

72

73 **Figure S4.** As in Figure S2, but for the absence of Granger causality from ENSO to annual ozone  
 74 concentrations at 850 hPa pressure level. ENSO: El Niño–Southern Oscillation.

MODELS MEAN: ENSO - SPRING OZONE (300 hPa) PERIOD 1850-2014 EXPERIMENT HISTORICAL

MODELS MEAN: ENSO - SUMMER OZONE (300 hPa) PERIOD 1850-2014 EXPERIMENT HISTORICAL

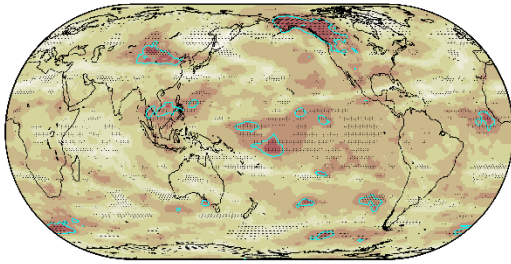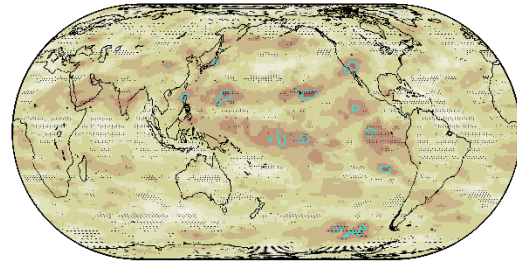

MODELS MEAN: ENSO - FALL OZONE (300 hPa) PERIOD 1850-2014 EXPERIMENT HISTORICAL

MODELS MEAN: ENSO - WINTER OZONE (300 hPa) PERIOD 1850-2014 EXPERIMENT HISTORICAL

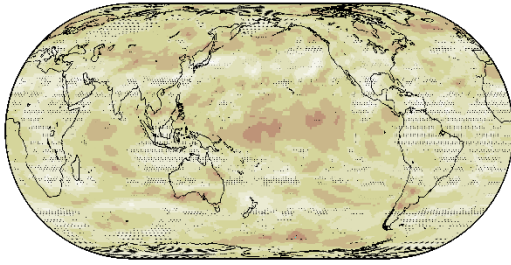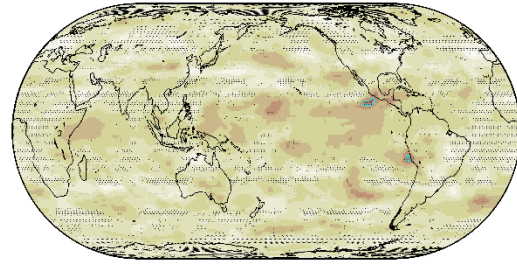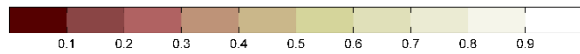

75

76 **Figure S5.** Multi-model mean probability map for the absence of Granger causality from ENSO during  
77 boreal winter [defined as  $D(t)JF(t+1)$ ;  $t$  denotes year  $t$ ] to seasonal mean ozone concentrations at 300 hPa  
78 pressure level over the period 1850-2014. (a) Spring [March, April, May;  $MAM(t+1)$ ]. (b) Summer [June,  
79 July, August;  $JJA(t+1)$ ]. (c) Fall [September, October, November;  $SON(t+1)$ ]. (d) Winter [December,  
80 January, February;  $D(t+1)JF(t+2)$ ]. Stippling demonstrates that at least 70% of total models show  
81 agreement on the mean probability of all models at a given grid point. The cyan contour line signifies  $p$ -  
82 value = 0.33. Brown shades denote a low probability for the absence of Granger causality. ENSO: El  
83 Niño–Southern Oscillation.



MODELS MEAN: ENSO - SPRING OZONE (500 hPa) PERIOD 1850-2014 EXPERIMENT HISTORICAL

MODELS MEAN: ENSO - SUMMER OZONE (500 hPa) PERIOD 1850-2014 EXPERIMENT HISTORICAL

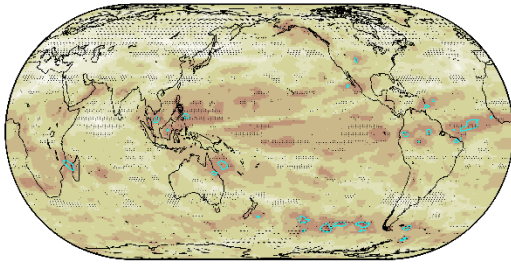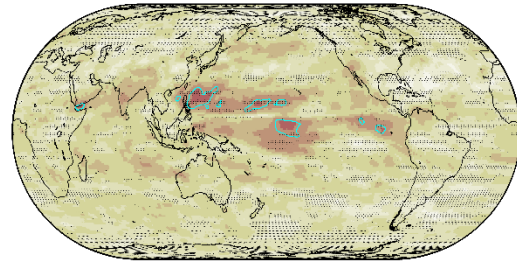

MODELS MEAN: ENSO - FALL OZONE (500 hPa) PERIOD 1850-2014 EXPERIMENT HISTORICAL

MODELS MEAN: ENSO - WINTER OZONE (500 hPa) PERIOD 1850-2014 EXPERIMENT HISTORICAL

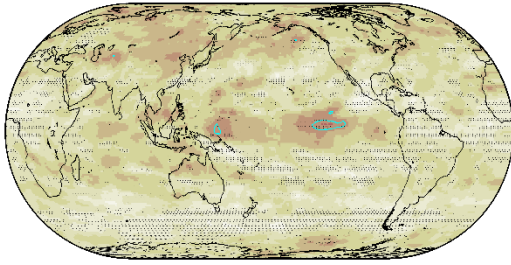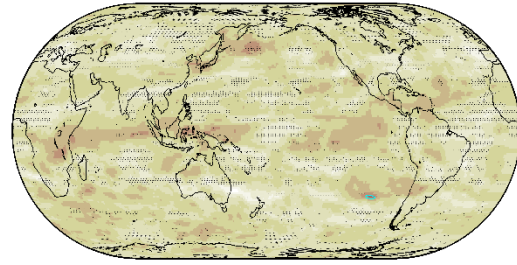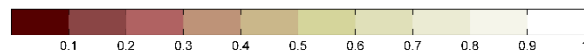

84

85 **Figure S6.** As in Figure S5, but for multi-model mean probability map for the absence of Granger  
86 causality from ENSO to seasonal mean ozone concentrations at 500 hPa pressure level. ENSO: El Niño–  
87 Southern Oscillation.

MODELS MEAN: ENSO - SPRING OZONE (850 hPa) PERIOD 1850-2014 EXPERIMENT HISTORICAL

MODELS MEAN: ENSO - SUMMER OZONE (850 hPa) PERIOD 1850-2014 EXPERIMENT HISTORICAL

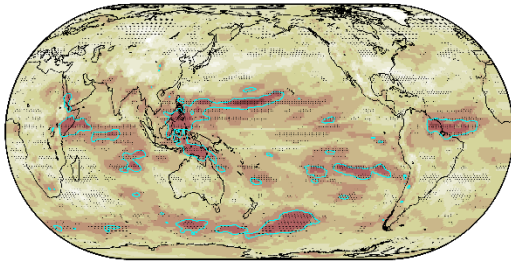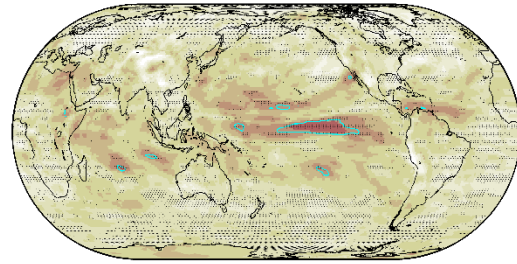

MODELS MEAN: ENSO - FALL OZONE (850 hPa) PERIOD 1850-2014 EXPERIMENT HISTORICAL

MODELS MEAN: ENSO - WINTER OZONE (850 hPa) PERIOD 1850-2014 EXPERIMENT HISTORICAL

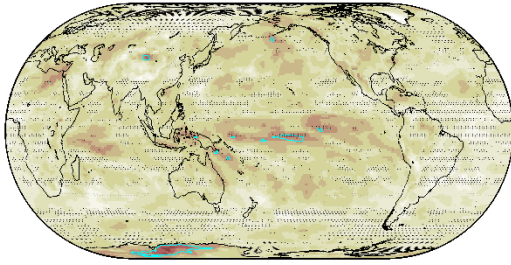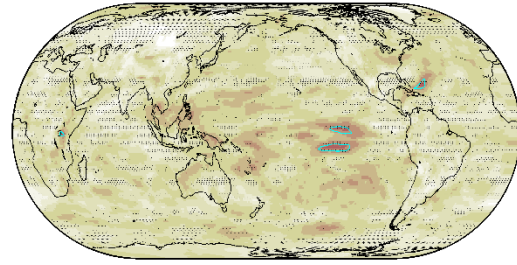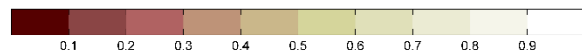

88

89 **Figure S7.** As in Figure S5, but for multi-model mean probability map for the absence of Granger  
90 causality from ENSO to seasonal mean ozone concentrations at 850 hPa pressure level. ENSO: El Niño–  
91 Southern Oscillation.
