# Supplementary material for: The influences of El Niño–Southern Oscillation on tropospheric ozone in CMIP6 models
Source: Copernicus journal article supplement (doi:10.5194/egusphere-2023-207), 2023-06-26
Supplement: Supplementary file [file egusphere-2023-207-AC1-supplement.pdf]

# 1 **1 Response to Reviewer #1's comments**

2 1.1 1. The Pacific decadal oscillation which is also one of the main climate mode that can affect  
3 ENSO and indeed on the ozone concentrations. The authors didn't explain why other climate  
4 modes are not considered and why only three (Dipole mode Index, Southern Annual Mode  
5 and North Atlantic Oscillation) climate modes.

6 **Response:** We thank the reviewer for raising this point. We agree that the Pacific decadal  
7 oscillation (PDO) is an important climate mode. However, as we mainly focus on the impacts of  
8 ENSO on interannual time scale, we have not included the PDO in the analysis.

9 We added the following sentences to Section 2.2 to clarify this point:

10 "In this study, the confounding factors are limited to three major climate modes (i.e., DMI, SAM  
11 and NAO) as these modes are crucial to global climate variability on interannual time scales  
12 (Delworth et al., 2016; Hurrell et al., 2003; Kripalani et al., 2009; Luo et al., 2012; Raphael and  
13 Holland, 2006). Furthermore, alterations in these climate modes may influence the variations of  
14 ENSO (Cai et al., 2019; Ha et al., 2017; Le et al., 2020; Le and Bae, 2019)."

15 1.2 2. Try to elaborate mainly the common schemes in the Atmospheric Chemistry Modules that  
16 are in the models (other than the three models BCC\_CSM2\_MR, IPSL\_CM6A\_LR and  
17 MPI\_ESM1\_2\_LR) as the behavior of these models in connection to the response of ENSO  
18 on ozone variation is similar.

19 **Response:** We thank the reviewer for raising this point. We added the following sentences to  
20 Section 2.1 and Section 4 to clarify this point:

21 "In Table 1, the models equipped with an Atmospheric Chemistry module are fully coupled where  
22 the chemistry scheme is associated with the physics of the atmospheric model, allowing for  
23 comprehensive consideration of interactions between climate variations, interactive chemistry, and  
24 carbon cycle (Emmons et al., 2020; Michou et al., 2020; Wu et al., 2019)."

25 "In these models, ozone variations are prescribed using observational data (Lurton et al., 2020;  
26 Wu et al., 2019), and it is expected that the response of ozone variation to atmospheric circulation  
27 and ENSO is not significant."

28 1.3 3. The Text S1 which explains about the method that has been adopted should be mentioned  
29 under the method section 2.2 rather than in the supplement. It helps the reader to have a  
30 quick through of the methodology adopted in the study.

31 **Response:** We thank the reviewer for this suggestion. We moved Text S1 to Section 2.2 of the  
32 main text.

33 1.4 4. Why did you consider only 1000 hPa, 850 hPa, 500 hPa and 300 hPa ? Are these pressure  
34 levels enough to represent the respective atmospheric region of the atmosphere (like middle  
35 troposphere, upper troposphere). As ENSO is responsible for changes in winds and  
36 circulation patterns. It is also expected to have impact on the transport of ozone from the  
37 lower troposphere to upper troposphere and lower stratosphere. It would be interesting if you  
38 can check if the features are same in the upper levels (above 300 hPa just below the  
39 tropopause)

40 **Response:** We thank the reviewer for raising this point. In our opinion, the selected pressure levels  
41 can represent much of the atmosphere as supported by the results described in Figure 2. In Figure  
42 2, there might be distinct impacts of ENSO on ozone over the lower, middle, and upper  
43 troposphere.

44 Below we show the analysis at 250 hPa. At this pressure level, the regions from 60N-90N are in  
45 the lower stratosphere, while the regions from 90S-60N are in the upper troposphere (Griffiths et  
46 al., 2021). Figure R1 below shows that the pattern of ENSO impacts for the analysis at 250 hPa is  
47 similar to the analysis at 300 hPa. Hence, we conclude that there is no significant change in ENSO  
48 impacts on ozone at the tropopause, though additional analyses might give clearer answer.

49 We added the following sentences to Sections 3 and 4 to discuss this point:

50 “Further analysis (not shown) indicates that the patterns of ENSO impacts on ozone at 250 hPa are  
51 similar to those at 300 hPa. This implies that the response of ozone variation to ENSO might  
52 remain consistent across the upper troposphere, the tropopause, and the lower stratosphere.”

53 “In addition, as the tropopause may vary depending on different latitudes (Griffiths et al., 2021),  
54 it is essential to conduct further analyses that specifically address the impacts of ENSO on ozone  
55 concentrations across the upper troposphere, the tropopause, and the lower stratosphere.”

MODELS MEAN: ENSO - OZONE (250 hPa) PERIOD 1850-2014 EXPERIMENT HISTORICAL

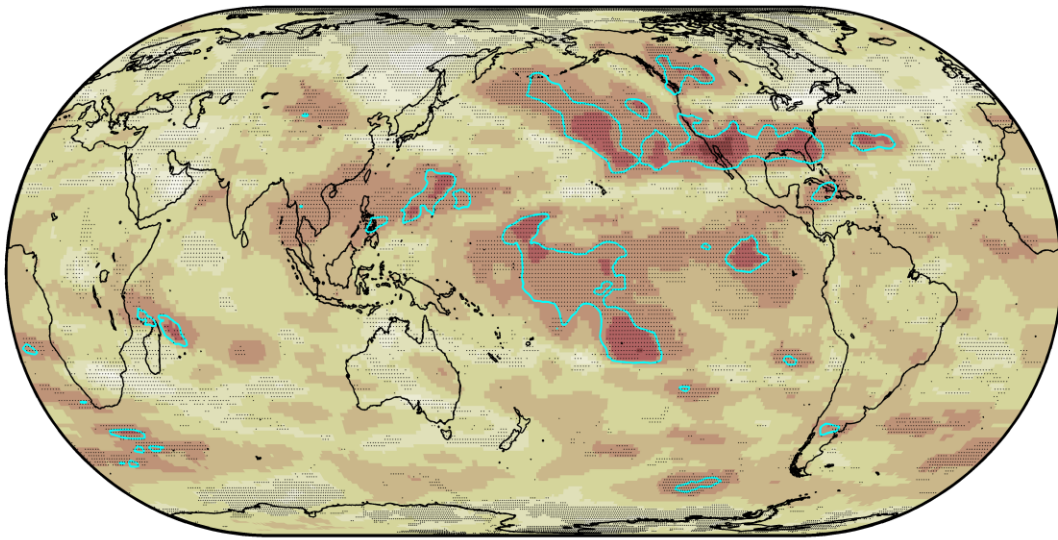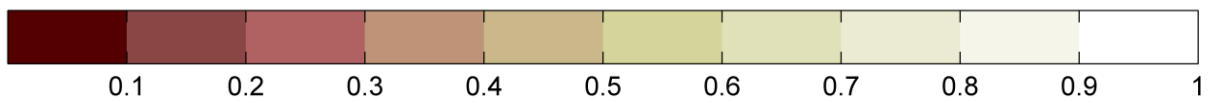

MODELS MEAN: ENSO - OZONE (300 hPa) PERIOD 1850-2014 EXPERIMENT HISTORICAL

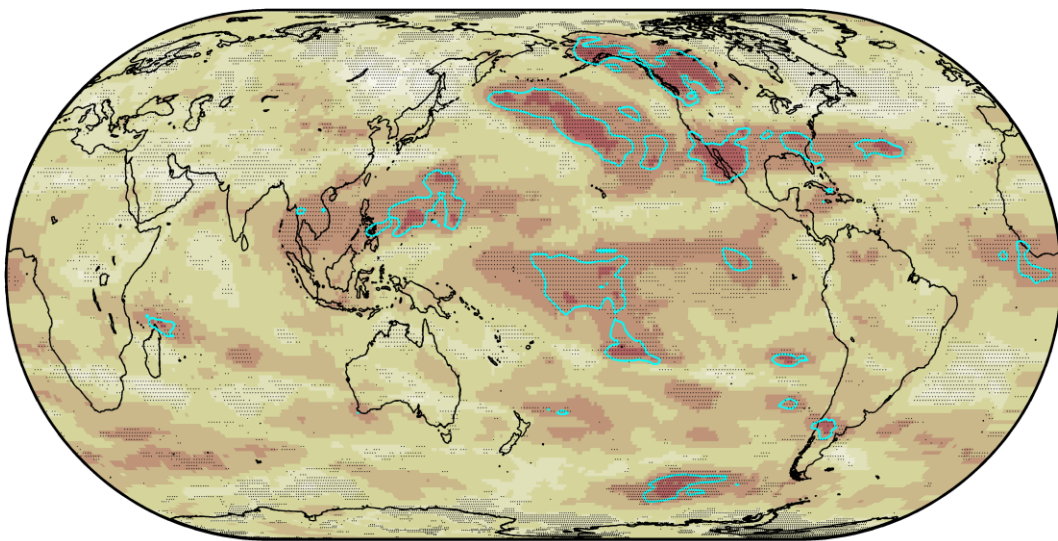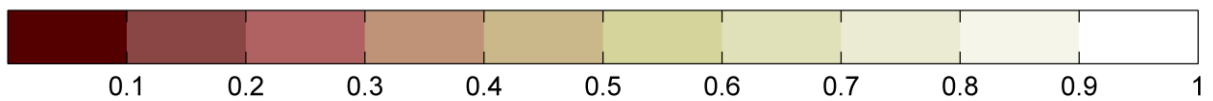

58 **Figure R1.** Map of multi-model mean probability for the absence of Granger causality from ENSO to  
59 annual ozone concentrations for the historical experiment over the 1850-2014 period at 250 hPa (upper)  
60 and 300 hPa (lower).

61 1.5 Line Nos.:42:43: Did you check if the findings obtained using CMIP6 and CMIP5 ? If so  
62 where did you find the changes that resulted in the current result?

63 **Response:** We thank the reviewer for raising this point. We have not tried to add the analyses of  
64 CMIP5 models because there is limitations in these models (Emmons et al., 2020; Michou et al.,  
65 2020).

66 Further explanation is added to Section 2.1:

67 “For example, the simulation of tropospheric ozone in CESM2 models is improved in comparison  
68 to previous model versions (Emmons et al., 2020). In addition, CMIP6 models are capable of  
69 simulating long-term changes in surface ozone levels and recent increasing trends in tropospheric  
70 ozone (Griffiths et al., 2021; Turnock et al., 2020).”

71 1.6 Line Nos.: 51: The list of the models mentioned in Table S1 should be shifted to the main  
72 manuscript instead of supplement.

73 **Response:** We thank the reviewer for this suggestion. We moved Table S1 to Section 2.1 of the  
74 main text.

75 1.7 Line Nos. 53:55: The authors are suggested to explain little more on the findings of the cited  
76 papers rather than just citing the paper.

77 **Response:** We thank the reviewer for raising this point. We added the following sentences to  
78 Section 2.1 to clarify this point:

79 “For instance, CMIP6 models may underestimate ozone levels in the Southern Hemisphere and  
80 overestimate ozone levels in the Northern Hemisphere compared to observational data of recent  
81 past (Griffiths et al., 2021; Turnock et al., 2020; Young et al., 2018).”

82 “For example, the simulation of tropospheric ozone in CESM2 models is improved in comparison  
83 to previous model versions (Emmons et al., 2020). In addition, CMIP6 models are capable of  
84 simulating long-term changes in surface ozone levels and recent increasing trends in tropospheric  
85 ozone (Griffiths et al., 2021; Turnock et al., 2020).”

86 1.8 The Figures can be of more clarity (mainly the stippling in figures are not at all visible (for  
87 example Figure 1 (a)) are not visible clearly, The titles in the Figure 3 should be made little  
88 big)

89 **Response:** We thank the reviewer for this suggestion. We will provide higher resolution figures.

## 90 **References**

- 91 Cai, W., Wu, L., Lengaigne, M., Li, T., McGregor, S., Kug, J.-S., Yu, J.-Y., Stuecker, M. F.,  
92 Santoso, A., Li, X., Ham, Y.-G., Chikamoto, Y., Ng, B., McPhaden, M. J., Du, Y., Dommenges,  
93 D., Jia, F., Kajtar, J. B., Keenlyside, N., Lin, X., Luo, J.-J., Martín-Rey, M., Ruprich-Robert, Y.,  
94 Wang, G., Xie, S.-P., Yang, Y., Kang, S. M., Choi, J.-Y., Gan, B., Kim, G.-I., Kim, C.-E., Kim,  
95 S., Kim, J.-H. and Chang, P.: Pantropical climate interactions, *Science* (80-. ), 363(6430),  
96 eaav4236, doi:10.1126/science.aav4236, 2019.
- 97 Delworth, T. L., Zeng, F., Vecchi, G. A., Yang, X., Zhang, L. and Zhang, R.: The North Atlantic  
98 Oscillation as a driver of rapid climate change in the Northern Hemisphere, *Nat. Geosci.*, 9(June),  
99 509–512, doi:10.1038/ngeo2738, 2016.
- 100 Emmons, L. K., Schwantes, R. H., Orlando, J. J., Tyndall, G., Kinnison, D., Lamarque, J. F.,  
101 Marsh, D., Mills, M. J., Tilmes, S., Bardeen, C., Buchholz, R. R., Conley, A., Gettelman, A.,  
102 Garcia, R., Simpson, I., Blake, D. R., Meinardi, S. and Pétron, G.: The Chemistry Mechanism in  
103 the Community Earth System Model Version 2 (CESM2), *J. Adv. Model. Earth Syst.*, 12(4), 1–  
104 21, doi:10.1029/2019MS001882, 2020.
- 105 Griffiths, P. T., Murray, L. T., Zeng, G., Shin, Y. M., Abraham, N. L., Archibald, A. T., Deushi,  
106 M., Emmons, L. K., Galbally, I. E., Hassler, B., Horowitz, L. W., Keeble, J., Liu, J., Moeini, O.,  
107 Naik, V., O’Connor, F. M., Oshima, N., Tarasick, D., Tilmes, S., Turnock, S. T., Wild, O., Young,  
108 P. J. and Zanis, P.: Tropospheric ozone in CMIP6 simulations, *Atmos. Chem. Phys.*, 21(5), 4187–  
109 4218, doi:10.5194/acp-21-4187-2021, 2021.
- 110 Ha, K.-J., Chu, J.-E., Lee, J.-Y. and Yun, K.-S.: Interbasin coupling between the tropical Indian  
111 and Pacific Ocean on interannual timescale: observation and CMIP5 reproduction, *Clim. Dyn.*,  
112 48(1–2), 459–475, doi:10.1007/s00382-016-3087-6, 2017.
- 113 Hurrell, J. W., Kushnir, Y., Ottersen, G. and Visbeck, M.: An overview of the North Atlantic  
114 Oscillation, in *Geophysical Monograph American Geophysical Union*, pp. 1–35, American  
115 Geophysical Union., 2003.
- 116 Kripalani, R. H., Oh, J. H. and Chaudhari, H. S.: Delayed influence of the Indian Ocean Dipole  
117 mode on the East Asia-West Pacific monsoon: possible mechanism, *Int. J. Climatol.*, 30(2), 197–  
118 209, doi:10.1002/joc.1890, 2009.
- 119 Le, T. and Bae, D.: Causal Links on Interannual Timescale Between ENSO and the IOD in CMIP5  
120 Future Simulations, *Geophys. Res. Lett.*, 46(5), 2820–2828, doi:10.1029/2018GL081633, 2019.

121 Le, T., Ha, K.-J., Bae, D.-H. and Kim, S.-H.: Causal effects of Indian Ocean Dipole on El Niño–  
122 Southern Oscillation during 1950–2014 based on high-resolution models and reanalysis data,  
123 *Environ. Res. Lett.*, 15(10), 1040b6, doi:10.1088/1748-9326/abb96d, 2020.

124 Luo, J. J., Sasaki, W. and Masumoto, Y.: Indian Ocean warming modulates Pacific climate change,  
125 *Proc. Natl. Acad. Sci. U. S. A.*, 109(46), 18701–18706, doi:10.1073/pnas.1210239109, 2012.

126 Lurton, T., Balkanski, Y., Bastrikov, V., Bekki, S., Bopp, L., Braconnot, P., Brockmann, P.,  
127 Cadule, P., Contoux, C., Cozic, A., Cugnet, D., Dufresne, J. L., Éthé, C., Foujols, M. A., Ghattas,  
128 J., Hauglustaine, D., Hu, R. M., Kageyama, M., Khodri, M., Lebas, N., Levvasseur, G.,  
129 Marchand, M., Ottlé, C., Peylin, P., Sima, A., Szopa, S., Thiéblemont, R., Vuichard, N. and  
130 Boucher, O.: Implementation of the CMIP6 Forcing Data in the IPSL-CM6A-LR Model, *J. Adv.*  
131 *Model. Earth Syst.*, 12(4), 1–22, doi:10.1029/2019MS001940, 2020.

132 Michou, M., Nabat, P., Saint-Martin, D., Bock, J., Decharme, B., Mallet, M., Roehrig, R., Séférian,  
133 R., Sénési, S. and Voltaire, A.: Present-Day and Historical Aerosol and Ozone Characteristics in  
134 CNRM CMIP6 Simulations, *J. Adv. Model. Earth Syst.*, 12(1), 1–31,  
135 doi:10.1029/2019MS001816, 2020.

136 Raphael, M. N. and Holland, M. M.: Twentieth century simulation of the southern hemisphere  
137 climate in coupled models. Part 1: Large scale circulation variability, *Clim. Dyn.*, 26(2–3), 217–  
138 228, doi:10.1007/s00382-005-0082-8, 2006.

139 Turnock, S. T., Allen, R. J., Andrews, M., Bauer, S. E., Deushi, M., Emmons, L., Good, P.,  
140 Horowitz, L., John, J. G., Michou, M., Nabat, P., Naik, V., Neubauer, D., O’Connor, F. M., Olivie,  
141 D., Oshima, N., Schulz, M., Sellar, A., Shim, S., Takemura, T., Tilmes, S., Tsigaridis, K., Wu, T.  
142 and Zhang, J.: Historical and future changes in air pollutants from CMIP6 models, *Atmos. Chem.*  
143 *Phys.*, 20(23), 14547–14579, doi:10.5194/acp-20-14547-2020, 2020.

144 Wu, T., Lu, Y., Fang, Y., Xin, X., Li, L., Li, W., Jie, W., Zhang, J., Liu, Y., Zhang, L., Zhang, F.,  
145 Zhang, Y., Wu, F., Li, J., Chu, M., Wang, Z., Shi, X., Liu, X., Wei, M., Huang, A., Zhang, Y. and  
146 Liu, X.: The Beijing Climate Center Climate System Model (BCC-CSM): The main progress from  
147 CMIP5 to CMIP6, *Geosci. Model Dev.*, 12(4), 1573–1600, doi:10.5194/gmd-12-1573-2019, 2019.

148 Young, P. J., Naik, V., Fiore, A. M., Gaudel, A., Guo, J., Lin, M. Y., Neu, J. L., Parrish, D. D.,  
149 Rieder, H. E., Schnell, J. L., Tilmes, S., Wild, O., Zhang, L., Ziemke, J., Brandt, J., Delcloo, A.,  
150 Doherty, R. M., Geels, C., Hegglin, M. I., Hu, L., Im, U., Kumar, R., Luhar, A., Murray, L.,  
151 Plummer, D., Rodriguez, J., Saiz-Lopez, A., Schultz, M. G., Woodhouse, M. T. and Zeng, G.:

152 Tropospheric Ozone Assessment Report: Assessment of global-scale model performance for  
153 global and regional ozone distributions, variability, and trends, edited by D. Helmig and A. Lewis,  
154 Elem. Sci. Anthr., 6, doi:10.1525/elementa.265, 2018.  
155
