# Supplementary material for: The influences of El Niño–Southern Oscillation on tropospheric ozone in CMIP6 models
Source: Copernicus journal article supplement (doi:10.5194/egusphere-2023-207), 2023-06-26
Supplement: Supplementary file [file egusphere-2023-207-AC2-supplement.pdf]

## 1 **2 Response to Reviewer #3's comments**

2 This study investigated the effect of ENSO on tropospheric ozone over the period 1850-2014,  
3 focusing on the 300, 500, 850 and 1000 hPa. The authors also used the probability for the absence  
4 of Granger causality from ENSO to ozone concentrations. The topic is interesting. However,  
5 before it can be considered for publication, some aspects need more explanation.

6 2.1 My major concern is that can the current CMIP6 model simulations including the ozone  
7 chemistry and it related physical and chemical processes. For example, the first BCC model  
8 does not have atmospheric chemistry model (Table S1), how can it predict ozone?

9 **Response:** We thank the reviewer for raising this point. We agree that several models do not have  
10 atmospheric chemistry model. However, it might be useful to include these models in the analysis.  
11 The comparison between different models may emphasize the importance of the atmospheric  
12 chemistry module. For the models without atmospheric chemistry module, the variations of ozone  
13 are prescribed and mainly based on observations (Lurton et al., 2020; Wu et al., 2019).

14 We added the following sentences to Section 4 to further clarify this point:

15 “In these models, ozone variations are prescribed using observational data (Lurton et al., 2020;  
16 Wu et al., 2019), and it is expected that the response of ozone variation to atmospheric circulation  
17 and ENSO is not significant.”

18 2.2 The No.3-6 are all CESM2 model. Do these model configurations predict tropospheric ozone  
19 with fully atmospheric chemistry?

20 **Response:** We thank the reviewer for raising this point.

21 We added the following sentences to Section 2.1 to further clarify this point:

22 “In Table 1, the models equipped with an Atmospheric Chemistry module are fully coupled where  
23 the chemistry scheme is associated with the physics of the atmospheric model, allowing for  
24 comprehensive consideration of interactions between climate variations, interactive chemistry, and  
25 carbon cycle (Emmons et al., 2020; Michou et al., 2020; Wu et al., 2019).”

26 “For example, the simulation of tropospheric ozone in CESM2 models is improved in comparison  
27 to previous model versions (Emmons et al., 2020).”

28 2.3 The MAM4 is the name of aerosol module not the atmospheric chemistry.

29 **Response:** We thank the reviewer for raising this point. We corrected the model name to  
30 MOZART-T1 (the Model for Ozone and Related chemical Tracers with new tropospheric  
31 chemistry scheme) (Emmons et al., 2020).

32 2.4 Also, are the simulated ozone in these models evaluated? Some models cannot well  
33 reproduce the global distribution of ozone and some cannot characterize the response of  
34 ozone to ENSO signal shown in observations.

35 **Response:** The performance of CMIP6 models in simulating ozone was assessed in previous  
36 works (Emmons et al., 2020; Griffiths et al., 2021; Turnock et al., 2020; Young et al., 2018). We  
37 agree with the reviewer that the models still have biases in simulating ozone. However, there is  
38 improvement in the current models.

39 We described this aspect in the section 2.1 of the original manuscript as below:

40 “There are biases in simulating tropospheric ozone variations in the models (Griffiths et al., 2021;  
41 Turnock et al., 2020; Young et al., 2018), however, CMIP model outputs are still helpful to  
42 investigate the effects of ENSO on tropospheric ozone (Archibald et al., 2020; Young et al.,  
43 2018).”

44 We added the following sentences to Section 2.1 to further explain this point:

45 “For instance, CMIP6 models may underestimate ozone levels in the Southern Hemisphere and  
46 overestimate ozone levels in the Northern Hemisphere compared to observational data of recent  
47 past (Griffiths et al., 2021; Turnock et al., 2020; Young et al., 2018).”

48 “For example, the simulation of tropospheric ozone in CESM2 models is improved in comparison  
49 to previous model versions (Emmons et al., 2020). In addition, CMIP6 models are capable of  
50 simulating long-term changes in surface ozone levels and recent increasing trends in tropospheric  
51 ozone (Griffiths et al., 2021; Turnock et al., 2020).”

52 2.5 The conclusions about the effect of ENSO on seasonal ozone in the troposphere can be added  
53 to the abstract.

54 **Response:** We thank the reviewer for this suggestion. We added the following sentence to the  
55 abstract.

56 “Springtime surface ozone is more sensitive to ENSO compared to other seasons”.

57 2.6 Line35-40: It is suggested to provide the details of the uncertainties regarding the causal  
58 effects of ENSO on global tropospheric ozone. Although the authors provided some  
59 references, the information from these references should be strengthened.

60 **Response:** We thank the reviewer for raising this point. We added the following sentences to the  
61 Introduction to further clarify this point:

62 “Moreover, a causal analysis (Le et al., 2022; Le and Bae, 2022) that takes into account the  
63 confounding impacts of other climate modes on the relationship between ENSO and tropospheric  
64 ozone is lacking. While the response of tropospheric ozone to ENSO can be interpreted by changes  
65 in ENSO-related atmospheric circulation (Lu et al., 2019; Sekiya and Sudo, 2012; Ziemke and  
66 Chandra, 2003), these changes might be influenced by other climate modes (Cai et al., 2019; Le et  
67 al., 2020).”

68 2.7 The effect of ENSO on ozone in the lower troposphere is more significant than that in the  
69 upper and middle troposphere. Please elaborate the reason.

70 **Response:** We thank the reviewer for raising this point. We modified the relevant paragraph in  
71 Section 4 to further discuss the different effects of ENSO on ozone at different pressure levels as  
72 below:

73 “The robust response of lower tropospheric ozone to ENSO is associated with ENSO-induced  
74 changes in the atmospheric circulation (Oman et al., 2011) and this response is particularly  
75 prominent over the tropics (Figures 2c and d). However, this response appears to be weaker over  
76 the middle and upper troposphere (Figures 2a and b). The weak impacts of ENSO on the mid-level  
77 tropospheric ozone (i.e., 500 hPa level, described in Figures 2b) might be due to the strong  
78 exchange between stratospheric ozone and middle to upper tropospheric ozone (Liu et al., 2017;  
79 Meul et al., 2018; Neu et al., 2014; Williams et al., 2019). The more pronounced reaction of upper  
80 tropospheric ozone to ENSO in comparison to middle tropospheric ozone could be attributed to  
81 the influence of ENSO on deep convective transport and the interconnected relationship between  
82 ENSO and the North Pacific Oscillation (Cai et al., 2019; Gaudel et al., 2020; Kug et al., 2020).”

83 2.8 Moreover, the models’ agreement is weak in reproducing ozone in the lower troposphere  
84 and the standard deviation is high in the tropics. In this context, is the conclusion that ENSO  
85 affects the lower troposphere in the tropics convincing?

86 The conclusion of ENSO effects on lower tropospheric ozone is convincing. We added the  
87 following sentences to the Section 4 to discuss this point:

88 “Despite the limited consensus among models in replicating ozone levels in the lower troposphere,  
89 and a high standard deviation particularly in tropical regions, (Figures 1 and S1), we observed  
90 noteworthy effects of ENSO on lower tropospheric ozone (Figure 2). These results exhibit a degree  
91 of independence and are not contradictory. This is because the models' mean of annual ozone is  
92 calculated over the entire 1850-2014 period, whereas the assessment of the relationship between  
93 the ENSO and annual ozone is conducted on a year-to-year basis. Furthermore, variations in ozone  
94 are also influenced by factors beyond ENSO, including other major climate modes, cyclones, and  
95 local emissions of ozone precursors such as nitrogen oxides (NO<sub>x</sub>), volatile organic compounds,  
96 and carbon monoxide (CO). Biases in simulating these factors contribute to the inconsistencies of  
97 ozone in the models, although there is consensus in simulating the connection between ENSO and  
98 ozone.”

99 2.9 Line 116 “The significant impacts of ENSO on ozone ... might be associated with the  
100 transport of ozone from east Asia”. If so, the effect of ENSO on ozone over east Asia should  
101 be found. But it doesn't. Can you add some explanation about it?

102 **Response:** We thank the reviewer for raising this point. We added the following sentences to  
103 Section 4 to further clarify this point:

104 “These impacts can be explained by the modulation of ENSO on springtime upper tropospheric  
105 ozone over east Asia (Figure S5a) and the connection between ENSO and the North Pacific  
106 Oscillation (Kug et al., 2020)”.

## 107 **References**

108 Archibald, A. T., Neu, J. L., Elshorbany, Y. F., Cooper, O. R., Young, P. J., Akiyoshi, H., Cox, R.  
109 A., Coyle, M., Derwent, R. G., Deushi, M., Finco, A., Frost, G. J., Galbally, I. E., Gerosa, G.,  
110 Granier, C., Griffiths, P. T., Hossaini, R., Hu, L., Jöckel, P., Josse, B., Lin, M. Y., Mertens, M.,  
111 Morgenstern, O., Naja, M., Naik, V., Oltmans, S., Plummer, D. A., Revell, L. E., Saiz-Lopez, A.,  
112 Saxena, P., Shin, Y. M., Shahid, I., Shallcross, D., Tilmes, S., Trickl, T., Wallington, T. J., Wang,  
113 T., Worden, H. M. and Zeng, G.: Tropospheric Ozone Assessment Report, *Elem. Sci. Anthr.*, 8(1),  
114 1–53, doi:10.1525/elementa.2020.034, 2020.

115 Cai, W., Wu, L., Lengaigne, M., Li, T., McGregor, S., Kug, J.-S., Yu, J.-Y., Stuecker, M. F.,  
116 Santoso, A., Li, X., Ham, Y.-G., Chikamoto, Y., Ng, B., McPhaden, M. J., Du, Y., Dommenges,  
117 D., Jia, F., Kajtar, J. B., Keenlyside, N., Lin, X., Luo, J.-J., Martín-Rey, M., Ruprich-Robert, Y.,  
118 Wang, G., Xie, S.-P., Yang, Y., Kang, S. M., Choi, J.-Y., Gan, B., Kim, G.-I., Kim, C.-E., Kim,  
119 S., Kim, J.-H. and Chang, P.: Pantropical climate interactions, *Science* (80-. ), 363(6430),  
120 eaav4236, doi:10.1126/science.aav4236, 2019.

121 Emmons, L. K., Schwantes, R. H., Orlando, J. J., Tyndall, G., Kinnison, D., Lamarque, J. F.,  
122 Marsh, D., Mills, M. J., Tilmes, S., Bardeen, C., Buchholz, R. R., Conley, A., Gettelman, A.,  
123 Garcia, R., Simpson, I., Blake, D. R., Meinardi, S. and Pétron, G.: The Chemistry Mechanism in  
124 the Community Earth System Model Version 2 (CESM2), *J. Adv. Model. Earth Syst.*, 12(4), 1–  
125 21, doi:10.1029/2019MS001882, 2020.

126 Gaudel, A., Cooper, O. R., Chang, K.-L., Bourgeois, I., Ziemke, J. R., Strode, S. A., Oman, L. D.,  
127 Sellitto, P., Nédélec, P., Blot, R., Thouret, V. and Granier, C.: Aircraft observations since the 1990s  
128 reveal increases of tropospheric ozone at multiple locations across the Northern Hemisphere, *Sci.*  
129 *Adv.*, 6(34), 1–12, doi:10.1126/sciadv.aba8272, 2020.

130 Griffiths, P. T., Murray, L. T., Zeng, G., Shin, Y. M., Abraham, N. L., Archibald, A. T., Deushi,  
131 M., Emmons, L. K., Galbally, I. E., Hassler, B., Horowitz, L. W., Keeble, J., Liu, J., Moeini, O.,  
132 Naik, V., O’Connor, F. M., Oshima, N., Tarasick, D., Tilmes, S., Turnock, S. T., Wild, O., Young,  
133 P. J. and Zanis, P.: Tropospheric ozone in CMIP6 simulations, *Atmos. Chem. Phys.*, 21(5), 4187–  
134 4218, doi:10.5194/acp-21-4187-2021, 2021.

135 Kug, J., Vialard, J., Ham, Y., Yu, J. and Lengaigne, M.: ENSO Remote Forcing, pp. 247–265.,  
136 2020.

137 Le, T. and Bae, D.: Causal influences of El Niño–Southern Oscillation on global dust activities,  
138 *Atmos. Chem. Phys.*, 22(8), 5253–5263, doi:10.5194/acp-22-5253-2022, 2022.

139 Le, T., Ha, K.-J., Bae, D.-H. and Kim, S.-H.: Causal effects of Indian Ocean Dipole on El Niño–  
140 Southern Oscillation during 1950–2014 based on high-resolution models and reanalysis data,  
141 *Environ. Res. Lett.*, 15(10), 1040b6, doi:10.1088/1748-9326/abb96d, 2020.

142 Le, T., Kim, S. and Bae, D.: Decreasing causal impacts of El Niño–Southern Oscillation on future  
143 fire activities, *Sci. Total Environ.*, 826, 154031, doi:10.1016/j.scitotenv.2022.154031, 2022.

144 Liu, J., Rodriguez, J. M., Steenrod, S. D., Douglass, A. R., Logan, J. A., Olsen, M. A., Wargan, K.  
145 and Ziemke, J. R.: Causes of interannual variability over the southern hemispheric tropospheric

146 ozone maximum, *Atmos. Chem. Phys.*, 17(5), 3279–3299, doi:10.5194/acp-17-3279-2017, 2017.

147 Lu, X., Zhang, L. and Shen, L.: Meteorology and Climate Influences on Tropospheric Ozone: a  
148 Review of Natural Sources, Chemistry, and Transport Patterns, *Curr. Pollut. Reports*, 5(4), 238–  
149 260, doi:10.1007/s40726-019-00118-3, 2019.

150 Lurton, T., Balkanski, Y., Bastrikov, V., Bekki, S., Bopp, L., Braconnot, P., Brockmann, P.,  
151 Cadule, P., Contoux, C., Cozic, A., Cugnet, D., Dufresne, J. L., Éthé, C., Foujols, M. A., Ghattas,  
152 J., Hauglustaine, D., Hu, R. M., Kageyama, M., Khodri, M., Lebas, N., Levvasseur, G.,  
153 Marchand, M., Ottlé, C., Peylin, P., Sima, A., Szopa, S., Thiéblemont, R., Vuichard, N. and  
154 Boucher, O.: Implementation of the CMIP6 Forcing Data in the IPSL-CM6A-LR Model, *J. Adv.  
155 Model. Earth Syst.*, 12(4), 1–22, doi:10.1029/2019MS001940, 2020.

156 Meul, S., Langematz, U., Kröger, P., Oberländer-Hayn, S. and Jöckel, P.: Future changes in the  
157 stratosphere-to-troposphere ozone mass flux and the contribution from climate change and ozone  
158 recovery, *Atmos. Chem. Phys.*, 18(10), 7721–7738, doi:10.5194/acp-18-7721-2018, 2018.

159 Michou, M., Nabat, P., Saint-Martin, D., Bock, J., Decharme, B., Mallet, M., Roehrig, R., Séférian,  
160 R., Sénési, S. and Voltaire, A.: Present-Day and Historical Aerosol and Ozone Characteristics in  
161 CNRM CMIP6 Simulations, *J. Adv. Model. Earth Syst.*, 12(1), 1–31,  
162 doi:10.1029/2019MS001816, 2020.

163 Neu, J. L., Flury, T., Manney, G. L., Santee, M. L., Livesey, N. J. and Worden, J.: Tropospheric  
164 ozone variations governed by changes in stratospheric circulation, *Nat. Geosci.*, 7(5), 340–344,  
165 doi:10.1038/ngeo2138, 2014.

166 Oman, L. D., Ziemke, J. R., Douglass, A. R., Waugh, D. W., Lang, C., Rodriguez, J. M. and  
167 Nielsen, J. E.: The response of tropical tropospheric ozone to ENSO, *Geophys. Res. Lett.*, 38(13),  
168 n/a-n/a, doi:10.1029/2011GL047865, 2011.

169 Sekiya, T. and Sudo, K.: Role of meteorological variability in global tropospheric ozone during  
170 1970-2008, *J. Geophys. Res. Atmos.*, 117(17), 1–16, doi:10.1029/2012JD018054, 2012.

171 Turnock, S. T., Allen, R. J., Andrews, M., Bauer, S. E., Deushi, M., Emmons, L., Good, P.,  
172 Horowitz, L., John, J. G., Michou, M., Nabat, P., Naik, V., Neubauer, D., O’Connor, F. M., Olivie,  
173 D., Oshima, N., Schulz, M., Sellar, A., Shim, S., Takemura, T., Tilmes, S., Tsigaridis, K., Wu, T.  
174 and Zhang, J.: Historical and future changes in air pollutants from CMIP6 models, *Atmos. Chem.  
175 Phys.*, 20(23), 14547–14579, doi:10.5194/acp-20-14547-2020, 2020.

176 Williams, R. S., Hegglin, M. I., Kerridge, B. J., Jöckel, P., Latter, B. G. and Plummer, D. A.:

177 Characterising the seasonal and geographical variability in tropospheric ozone, stratospheric  
178 influence and recent changes, *Atmos. Chem. Phys.*, 19(6), 3589–3620, doi:10.5194/acp-19-3589-  
179 2019, 2019.

180 Wu, T., Lu, Y., Fang, Y., Xin, X., Li, L., Li, W., Jie, W., Zhang, J., Liu, Y., Zhang, L., Zhang, F.,  
181 Zhang, Y., Wu, F., Li, J., Chu, M., Wang, Z., Shi, X., Liu, X., Wei, M., Huang, A., Zhang, Y. and  
182 Liu, X.: The Beijing Climate Center Climate System Model (BCC-CSM): The main progress from  
183 CMIP5 to CMIP6, *Geosci. Model Dev.*, 12(4), 1573–1600, doi:10.5194/gmd-12-1573-2019, 2019.

184 Young, P. J., Naik, V., Fiore, A. M., Gaudel, A., Guo, J., Lin, M. Y., Neu, J. L., Parrish, D. D.,  
185 Rieder, H. E., Schnell, J. L., Tilmes, S., Wild, O., Zhang, L., Ziemke, J., Brandt, J., Delcloo, A.,  
186 Doherty, R. M., Geels, C., Hegglin, M. I., Hu, L., Im, U., Kumar, R., Luhar, A., Murray, L.,  
187 Plummer, D., Rodriguez, J., Saiz-Lopez, A., Schultz, M. G., Woodhouse, M. T. and Zeng, G.:  
188 Tropospheric Ozone Assessment Report: Assessment of global-scale model performance for  
189 global and regional ozone distributions, variability, and trends, edited by D. Helmig and A. Lewis,  
190 *Elem. Sci. Anthr.*, 6, doi:10.1525/elementa.265, 2018.

191 Ziemke, J. R. and Chandra, S.: La Nina and El Nino - Induced variabilities of ozone in the tropical  
192 lower atmosphere during 1970-2001, *Geophys. Res. Lett.*, 30(3), 30–33,  
193 doi:10.1029/2002GL016387, 2003.

194
